# Supplementary material for: A high-performance supercapacitor-battery hybrid energy storage device based on graphene-enhanced electrode materials with ultrahigh energy density
Source: Royal Society of Chemistry journal article supplement (doi:10.1039/c3ee40509e), 2013-01-01
Supplement: c3ee40509e.pdf [file c3ee40509e.pdf]

## Electronic Supplementary Information for

### **A high-performance supercapacitor-battery hybrid energy storage device based on graphene-enhanced electrode materials with ultrahigh energy density**

Fan Zhang, Tengfei Zhang, Xi Yang, Long Zhang, Kai Leng, Yi Huang and Yongsheng Chen\*

*Key Laboratory of Functional Polymer Materials and Centre for Nanoscale Science and Technology, Institute of Polymer Chemistry, College of Chemistry, Nankai University, 300071, Tianjin, China.*

Corresponding author: [yschen99@nankai.edu.cn](mailto:yschen99@nankai.edu.cn)

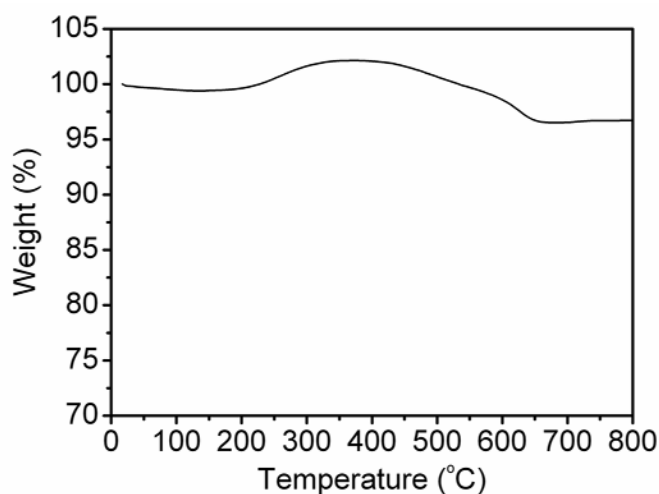

**Fig. S1** Thermogravimetric analysis (TGA) curve of  $\text{Fe}_3\text{O}_4/\text{G}$  composite, measured from 20 to 800 °C at a heating rate of 10 °C/min in air. According to the TGA result, the weight percentage of graphene is 3.3 wt % in the  $\text{Fe}_3\text{O}_4/\text{G}$  composite.

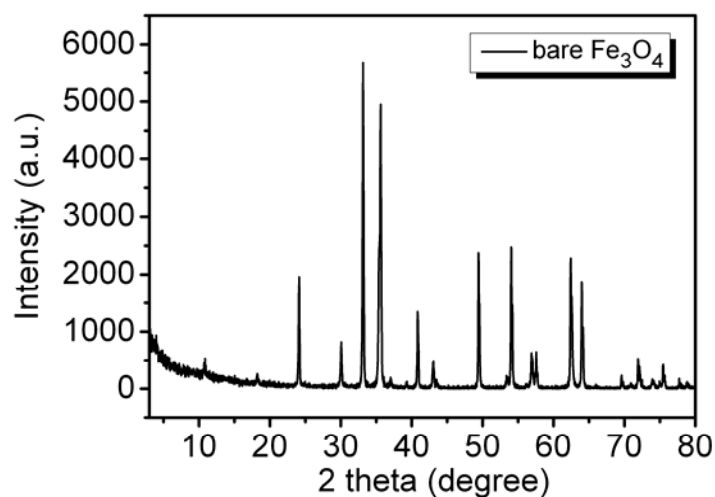

**Fig. S2** XRD profile of as-prepared  $\text{Fe}_3\text{O}_4$  in the same condition. It shows that the product is a mixture of  $\text{Fe}_3\text{O}_4$  and  $\text{Fe}_2\text{O}_3$ , indicating that the  $\text{Fe}_3\text{O}_4$  is more inclined to form the stable  $\text{Fe}_2\text{O}_3$  during the processing without graphene.

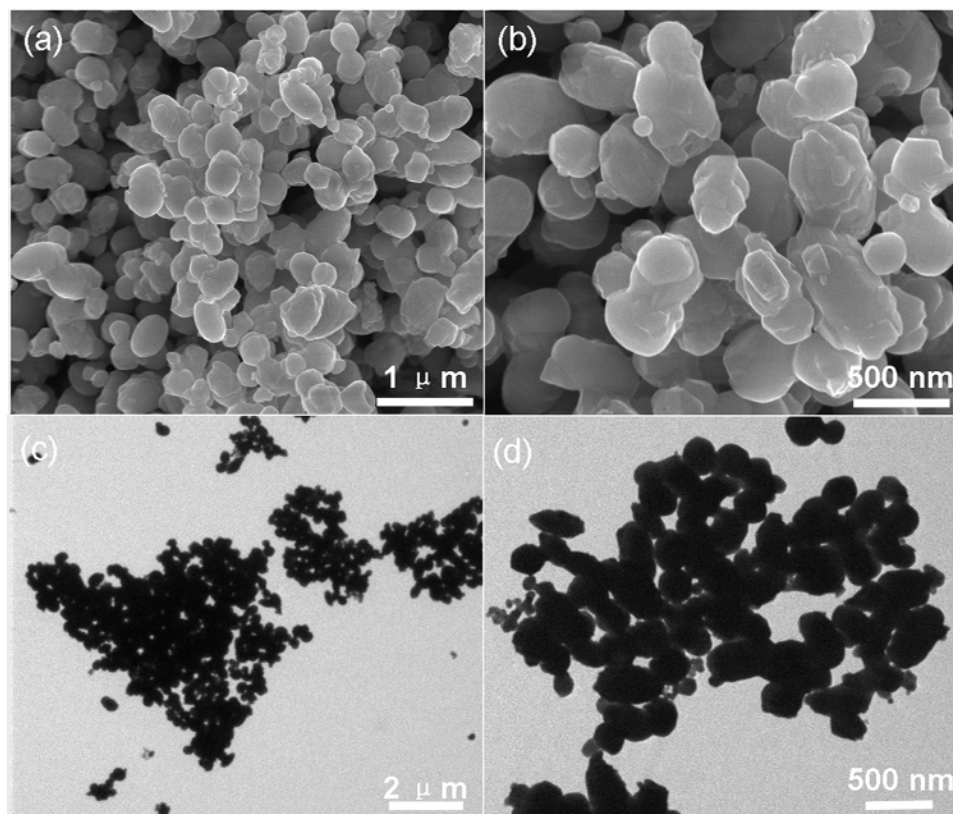

**Fig. S3** SEM (a, b) and TEM (c, d) images of as-prepared  $\text{Fe}_3\text{O}_4$  in the same condition. It can be clearly seen that compared to  $\text{Fe}_3\text{O}_4/\text{G}$  composite, the bare  $\text{Fe}_3\text{O}_4$  have larger particle sizes of about 200-500 nm with severe agglomeration.

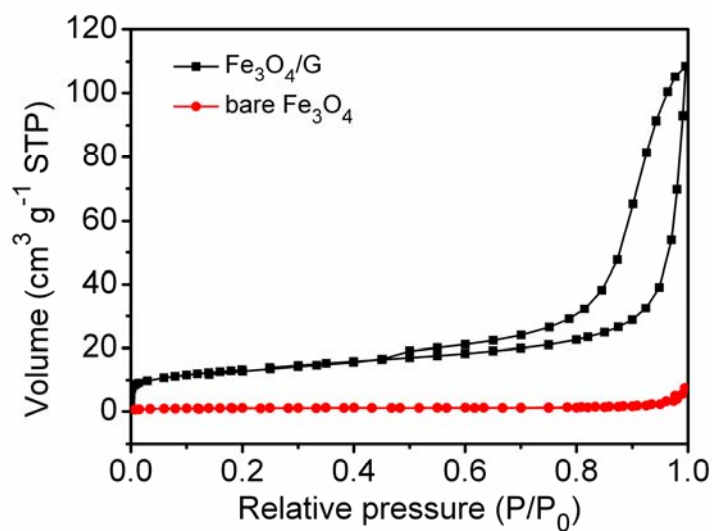

**Fig. S4**  $\text{N}_2$  adsorption/desorption isotherms of  $\text{Fe}_3\text{O}_4/\text{G}$  nanocomposite and bare  $\text{Fe}_3\text{O}_4$ . The results indicate that the  $\text{Fe}_3\text{O}_4/\text{G}$  nanocomposite is more porous mainly with mesopores and the surface area is much higher than that of bare  $\text{Fe}_3\text{O}_4$ .

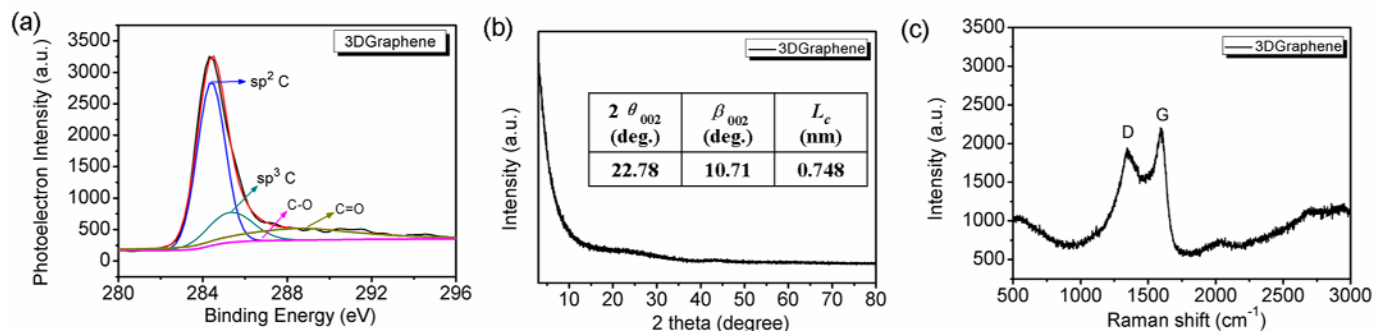

**Fig. S5** (a) XPS spectra of C1s and their deconvolution for the material 3DGraphene. The primary C1s XPS peak mainly appears at a binding energy of 284.4 eV, assigned to  $sp^2$ -bonded carbon. Meanwhile, there are other much weaker peaks that can be identified as  $sp^3$ -bonded carbon at 285.3 eV, C-O at 286.8 eV, and C=O at 288.5 eV respectively.<sup>1</sup> (b) XRD profile of 3DGraphene and its lattice parameters. The average graphene domains height ( $L_c$ ) can be approximately determined to be ~0.748 nm (calculated by the Scherrer's equation,<sup>2</sup> indicating a much disordered porous structure with mainly single-layered graphene sheets. (c) Raman spectrum of 3DGraphene material. Lorentzian fitting was examined to obtain the positions and widths of the D and G bands. The size of graphene sheets ( $L_a$ , nm) can be estimated by equation  $L_a$  (nm) =  $(560/E^4)(I_D/I_G)^{-1}$ ,<sup>3</sup> where  $E$  is the laser energy in nanometers ( $\lambda = 514.5$  nm, 2.41 eV), and  $I_D$  and  $I_G$  are the intensities of the D and G bands, respectively. The approximate dimensional size of the graphene nanosheets is ~6.6 nm.

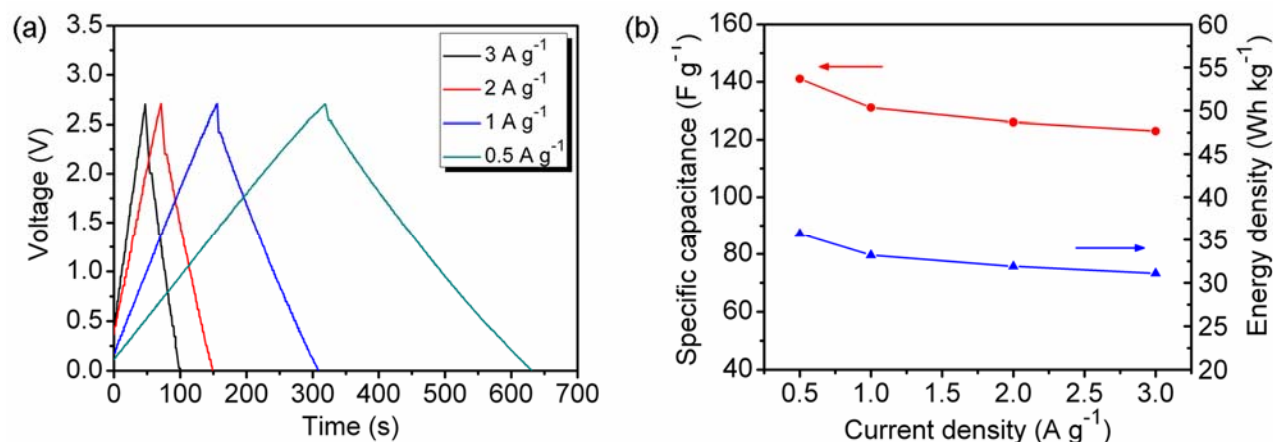

**Fig. S6** (a) Galvanostatic charge/discharge curves of SUAC-based supercapacitor at current densities of 0.5-3 A g<sup>-1</sup> in the voltage range of 0-2.7 V. (b) Specific capacitances and energy densities of SUAC-based supercapacitor at different densities. The SUAC product showed lower specific capacitance of 126-141 F g<sup>-1</sup> and energy density of 31.1-35.7 Wh kg<sup>-1</sup> at current densities of 0.5-3 A g<sup>-1</sup>. All these values were calculated based on the mass of single electrode activate material.

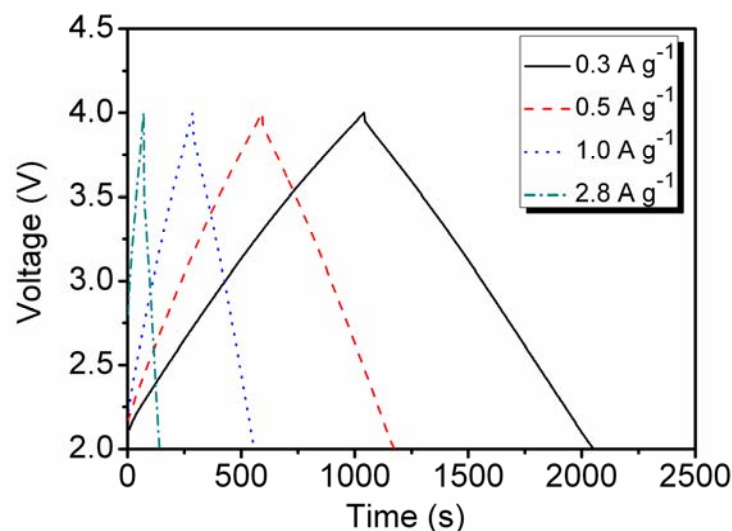

**Fig. S7** Galvanostatic charge/discharge curves of 3DGraphene-based half cell (vs.  $\text{Li/Li}^+$ ) at different current densities in the voltage range of 2.0-4.0 V.

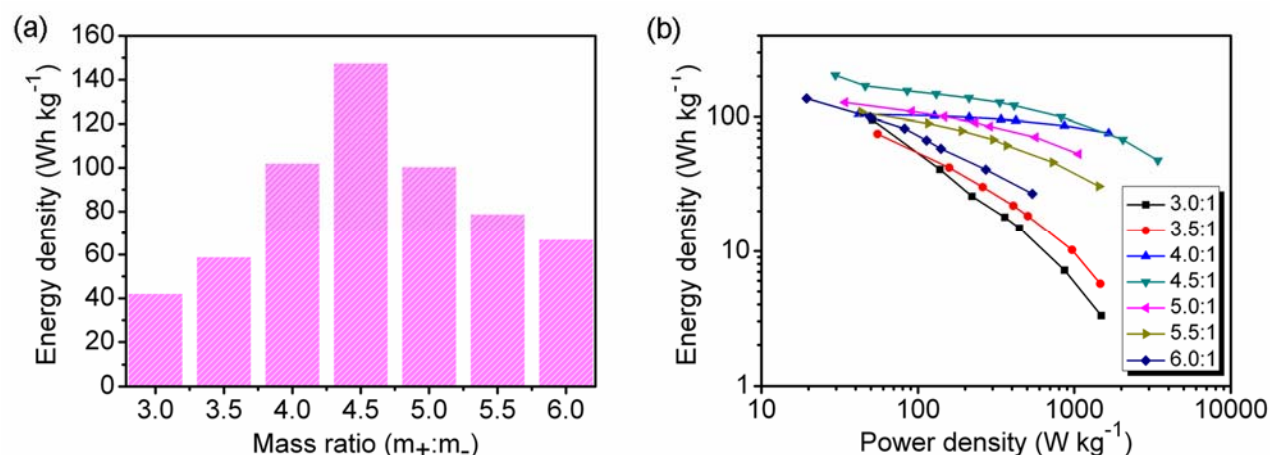

**Fig. S8** (a) Energy density of  $\text{Fe}_3\text{O}_4/\text{G}/\text{3DGraphene}$  hybrid devices with different mass ratios of positive vs. negative materials. The power density is  $\sim 150 \text{ W} \cdot \text{kg}^{-1}$  based on the total mass of both electrodes for the optimized ratio of 4.5:1, and the voltage range is 1.0–4.0 V. (b) Ragone plots (power density vs. energy density) of  $\text{Fe}_3\text{O}_4/\text{G}/\text{3DGraphene}$  hybrid devices with different mass ratios of positive against negative materials in the voltage range of 1.0–4.0 V. At the mass ratio of 3DGraphene:  $\text{Fe}_3\text{O}_4/\text{G} = 4.5:1$ , the hybrid cell achieves the highest energy density of  $147 \text{ Wh kg}^{-1}$  under the same power density ( $\sim 150 \text{ W kg}^{-1}$ ), and the tendency remains almost the same with increasing the charging/discharging rate, thus the optimized mass ratio of 4.5:1 is selected in the work.

## References

- 1 M. Rybachuk and J. Bell, *Carbon*, 2009, **47**, 2481.
- 2 P. H. Klug and E. L. Alexander, *X-ray Diffraction Procedures for Poly-crystalline and Amorphous Materials*, John Wiley & Sons, New York, 1974.
- 3 L. G. Cancado, K. Takai, T. Enoki, M. Endo, Y. A. Kim, H. Mizusaki, A. Jorio, L. N. Coelho, R. Magalhães-Paniago and M. A. Pimenta, *Appl. Phys. Lett.*, 2006, **88**, 163106.
